# Supplementary material for: Identification of a new family of peptidoglycan transpeptidases reveals atypical crosslinking is essential for viability in Clostridioides difficile
Source: PubMed Central journal article supplement — bioRxiv. 2024 Mar 14:2024.03.14.584917. Preprint. [Version 1] doi: 10.1101/2024.03.14.584917 (PMC10980060; doi:10.1101/2024.03.14.584917), 2024-03-14
Supplement: media-2.pdf [file media-2.pdf]

**Supplementary Information for:**

**Identification of a new family of peptidoglycan transpeptidases reveals atypical crosslinking is essential for viability in *Clostridioides difficile***

Kevin W. Bollinger<sup>1</sup>, Ute Müh<sup>1</sup>, Karl L. Ocius<sup>2</sup>, Alexis J. Apostolos<sup>2,6</sup>, Marcos M. Pires<sup>2</sup>, Richard F. Helm<sup>3</sup>, David L. Popham<sup>4</sup>, David S. Weiss<sup>1,5,\*</sup>, and Craig D. Ellermeier<sup>1,5,\*</sup>

<sup>1</sup>Department of Microbiology and Immunology, Carver College of Medicine, University of Iowa, Iowa City, IA, USA; <sup>2</sup>Department of Chemistry, University of Virginia, Charlottesville, VA, USA; <sup>3</sup>Department of Biochemistry, Virginia Tech, Blacksburg, VA, USA; <sup>4</sup>Department of Biological Sciences, Virginia Tech, Blacksburg, VA, USA; <sup>5</sup>Graduate Program in Genetics, University of Iowa, Iowa City, IA USA; <sup>6</sup>Present address: Haleon, 1211 Sherwood Ave, Richmond, VA 23220.

\*Corresponding authors: [david-weiss@uiowa.edu](mailto:david-weiss@uiowa.edu), [craig-ellermeier@uiowa.edu](mailto:craig-ellermeier@uiowa.edu)

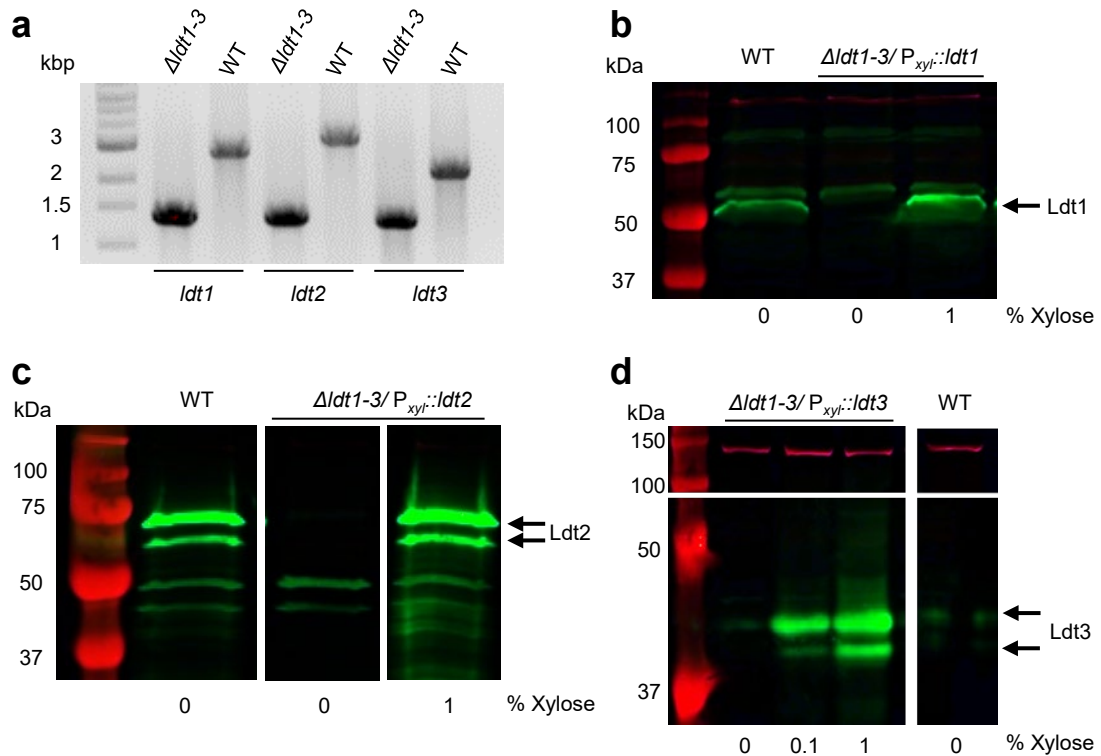

**Supplemental Fig. 1. Validation of  $\Delta ldt1-3$  deletion mutant.** (a) PCR amplification products obtained using primers that flank the indicated gene deletion. Reaction mixtures were analyzed on a 1% agarose gel that was stained with ethidium bromide and photographed. Gel is representative of 2 experiments. (b-d) Western blots with antisera raised against soluble extracellular domain of the indicated Ldt protein. Blots are representative of at least three biological replicates. Overnight cultures of WT or the  $\Delta ldt1-3$  mutant harboring a  $P_{xyf}::ldt$  expression plasmid were diluted 1:100 into TY or TY-thiamphenicol with or without xylose as indicated. Samples were taken for Western blotting at  $OD_{600} \sim 0.8$ . The predicted molecular masses are: Ldt1, 52.5 kDa; Ldt2, 71.9 kDa; Ldt3, 33.3 kDa. Note that Ldt3 is essentially not expressed in WT and this blot includes an inset (above) showing an unknown biotinylated protein detected with a red streptavidin probe as a loading control. The same control is also faintly visible in the Ldt1 blot. Strains used: WT, R20291;  $\Delta ldt1-3$ , KB124;  $\Delta ldt1-3/P_{xyf}::ldt1$ , KB210;  $\Delta ldt1-3/P_{xyf}::ldt2$ , KB154; and  $\Delta ldt1-3/P_{xyf}::ldt3$ , KB181.

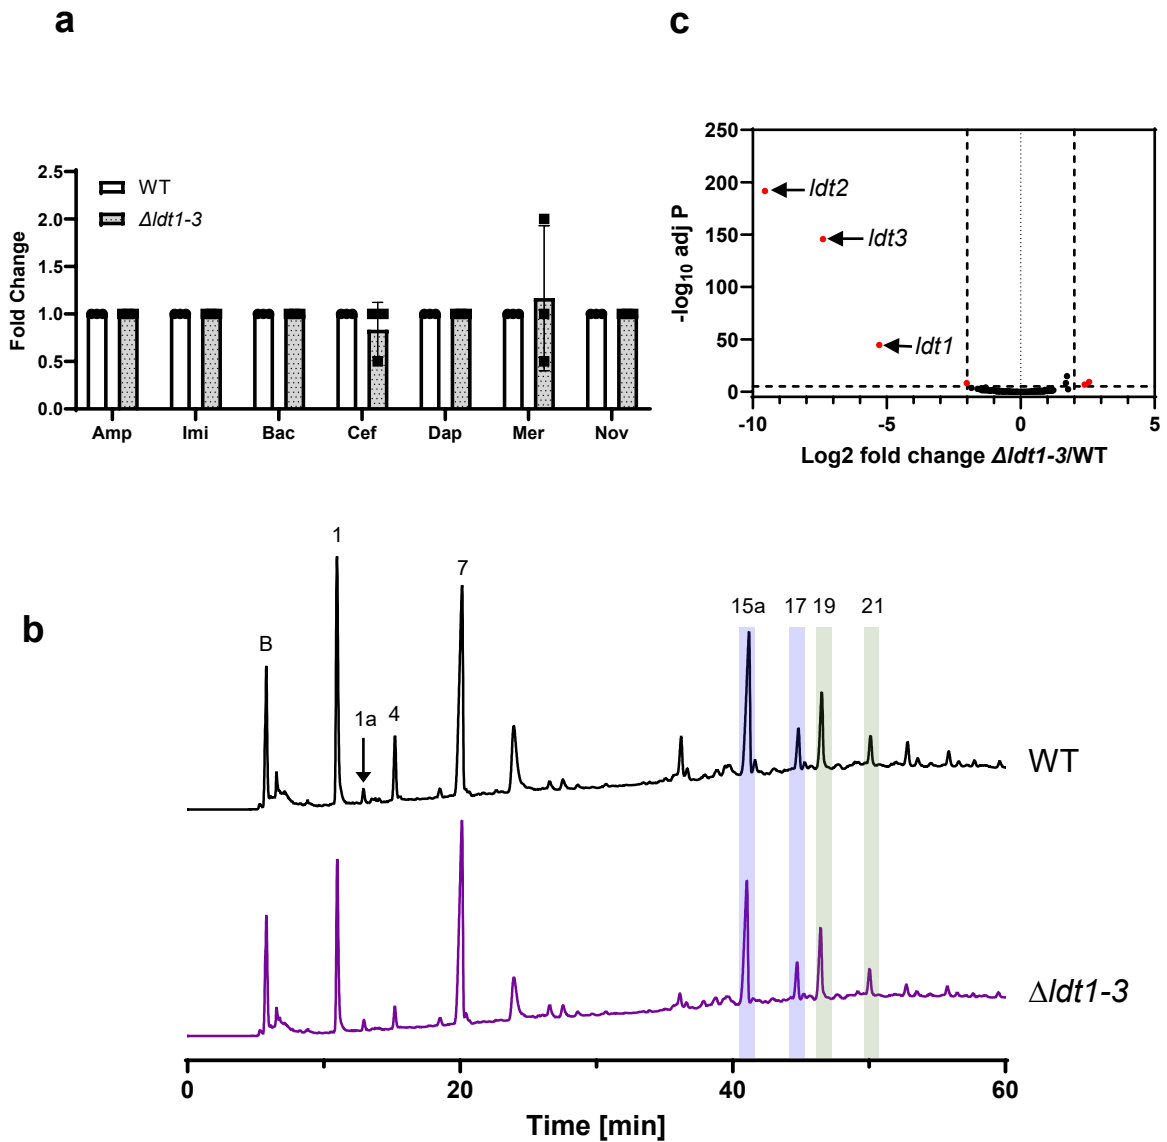

**Supplemental Fig. 2. The  $\Delta ldt1-3$  deletion mutant is similar to wild-type in antibiotic sensitivity, transcriptional profile, and PG composition.** (a) Minimum inhibitory concentration of select antibiotics against the wild type (WT) strain and  $\Delta ldt1-3$ . Data are from three biological replicates and reported as fold change difference between the strains. Abbreviations as follows with wild type MIC in brackets. Amp: ampicillin (3.1  $\mu\text{g}/\text{mL}$ ), Imi: imipenem (6.3  $\mu\text{g}/\text{mL}$ ), Bac: bacitracin (250  $\mu\text{g}/\text{mL}$ ), Cef: cefoxitin (200  $\mu\text{g}/\text{mL}$ ), Dap: daptomycin (1.6  $\mu\text{g}/\text{mL}$ ), Mer: meropenem (2.08  $\mu\text{g}/\text{mL}$ ), Nov: novobiocin (16.7  $\mu\text{g}/\text{mL}$ ). (b) Muropeptide analysis. HPLC chromatograms representative of three biological replicates are shown with the major 3-3 and 4-3 crosslinked muropeptides numbered as in Peltier et al.<sup>15</sup> and highlighted in blue (3-3) or green (4-3). (c) Volcano plot comparing transcriptome of the  $\Delta ldt1-3$  strain to wild type growing in TY. Vertical dotted lines:  $\log_2$ -fold change=2; horizontal dotted line:  $-\log_{10}$  adjusted P-value=5. Red dots indicate genes with  $\log_2$ -fold > 2 and  $-\log_{10}$  adjusted P-value > 5. The genes encode the three deleted *ldts* and three more that just exceed the cut-offs, *cdr\_2121-2122* (*sinR*, *sinR'*) and *cdr\_2123*, a small hypothetical. Strains used: WT, R20291;  $\Delta ldt1-3$ , KB124.

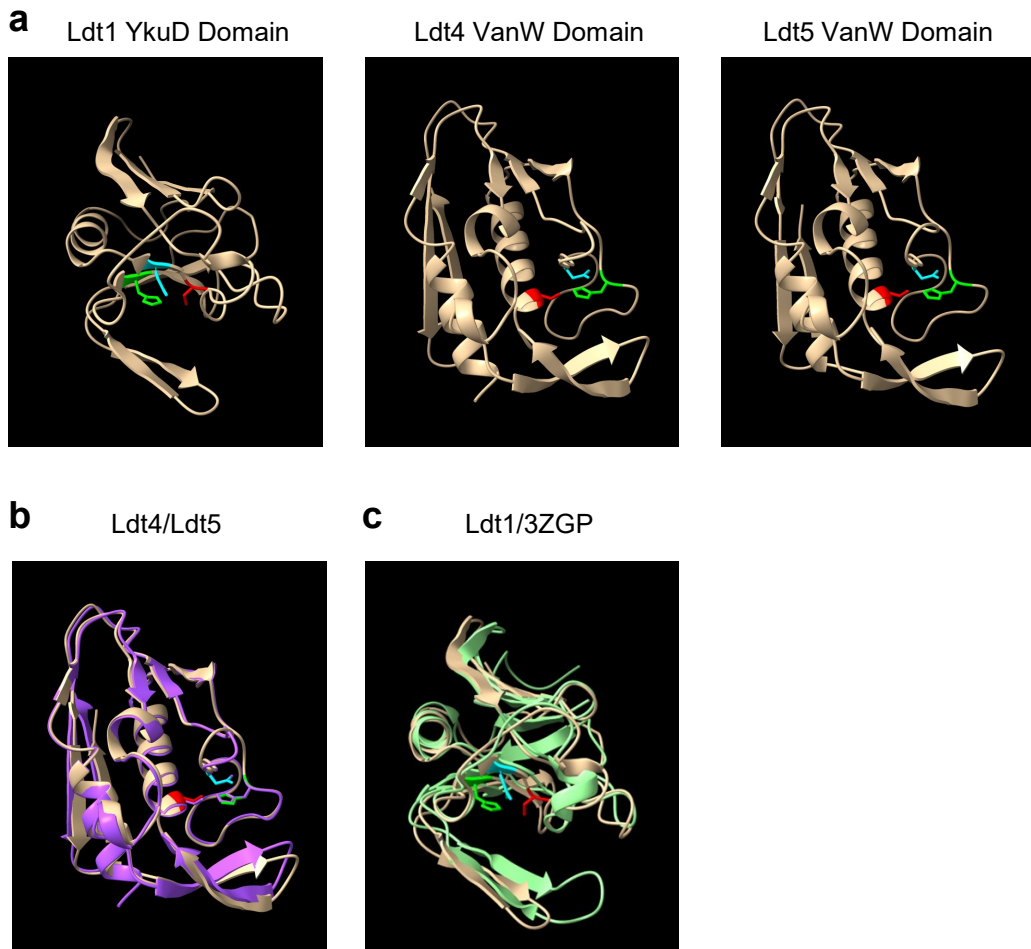

**Supplemental Fig. 3. The YkuD and VanW domains have different folds.** (a) AlphaFold2 structures of catalytic domains *C. difficile* Ldt1, Ldt4 and Ldt5. Catalytic triad residues are highlighted: Cys (red), His (green), Asp (cyan). (b) Overlay of the AlphaFold2 VanW domains from Ldt4 (purple) and Ldt5 (brown) show very similar folds. (c) Overlay of the AlphaFold2-predicted structure of the YkuD domain from Ldt1 (brown) with the NMR-determined structure of the YkuD domain from *E. faecium* Ldt (3ZGP, green).

```

C. difficile LDT4      NRSINIKLATDNI SNVLLMPGETFSFNKHTGKRSKENG YKSAPVIMEGEMEEDYGGGV CQ
C. difficile LDT5      GRSYNVGLSARKTSDVLLMPGEEF SYNKLTGPSNKANGYKDAPVIVYGKLEQSAAGGV CQ
S. wolfeii           GEETNVYIAACLQGT VVKSGQIF SQNEKIGPYSQDKGFQPGPVYIGHQLKTTVGGGV CK
R. cellulolyticum     GEEENVHLAARLLAGTVVKKPGEVFSQNNKIGPYVIARGFKKKGPTYIGTKLTTIGGGV CK
G. acidurici          GEEYNVHLAAKSLAGIVVPPGAVFSQNASIGPYTESKGYKKGPTYMGPKITTTTEGGGV CK
A. oremlandii        GEEYNVHLAARTLSGTVIQPGETFSQNRIGPYTKARGYQEGPTYIGGGVTTTEGGGV CK
D. ruminis            GEEYNIGLAASKLAGTVIKAGAVFSQNTLGPYTSKGYQAGPTYAGSKVTTVGGGV CK
D. acetoxidans       AEGYNIGLAAQQLAGTVVQAEVFSQNH TLGPYIESKGYKAGPTYSGNQ LITTVGGGV CK
C. calidirosea       SQRNRARLAAWAVNGAVVPPGG LFSFDKRVGSWSADHG YVQAPVSYD GELVNAVGGGV CQ
S. acidophilus       SQAKNIELVAQRLNGTVVKKPGQIFSY YARVGPYTAENGFGWGRMFVGD RIVPSIGGGV CQ
D. audaxviator       ---NAVQAAAYLNGITVQPGQVFSFNQTVGPR TAERGFVIGY AISGDRHVPARGGGV CR
M. thermoacetica     PSLHNARLAGQYLNGLVVPPGGVVS FNNVVGPRTGARGFVPGIIFMGDQKVPEI GGGICR
      *          .          :          *          *          .          :          *          :
C. difficile LDT4      VSSTLYNSVLVYAGLEIVNVKNHTIPSSYVVPKGRDATVADSGIDFLFKNNLKHVPVYIKNYV
C. difficile LDT5      TSSTVYNAAALLSGMEITQVTNHSSASTYVVPKGRDATVSDGGLNLKFKNNPYKHPVYIKNYA
S. wolfeii           IASTLYNVITILSNLPVIERYAHSMVPVYVPLGQDATVCYGVKDFKFLNNSPYPIL IWAES
R. cellulolyticum     MASTLYNVAILSNLPVVERHAHSMVPVYVPGQDATVSYGNKDLKFKNNTSSPIMIWAQG
G. acidurici          IASTLYNVAIYSNLEVVVERYNH TMPVYVVPYGGDATVAYGFKDLKFKNNTDFPIL IWAEG
A. oremlandii        IASTLYNVAILSDLQIVERHNHGMVPVYVPGQDATVAYGAKDIRFKNNTDSPIL IWSVG
D. ruminis            IASLLYNVATLSDLQIMRYPHSMTPVYVPPGQDATVFCGVKDLRFLNNTGGSVMIWSQK
D. acetoxidans       IASMLYNVVTFCDLKVISRSPHSMTPVYVPPGQDATVYVYGCDFSEFNDSGRPIL IWAQK
C. calidirosea       TSSTLYNAAALLAGMQIVERHPHHFCPEYVPPGRDAVAVAQTIIDLRFKNPPYPWPVRIECRA
S. acidophilus       GSSTLYAALLRTGLPIIERHHHGLTVPYLPPGEDATVASDYLDLRFKNNRTPILIT AQA
D. audaxviator       TSTVLYGAVLNAGLPVIERHAHTRPVGYVPMGRDATVSYGTADLKFERNDLRPPVRIKAGG
M. thermoacetica     TATLLHNAVLSAGLEVVERHRHGLPVTYVPPGYDATVYVYGVLDYRFKNRNPVPV I KLEFTS
      :          :          .          :          *          *          *          *          *          :          :
C. difficile LDT4      SGNQIVCNIY
C. difficile LDT5      GGGSVSSVIY
S. wolfeii           IGNRLYIAFY
R. cellulolyticum     VDNILYVAFY
G. acidurici          IENRLYIGFY
A. oremlandii        IDNTLYIGFY
D. ruminis            VGN TVYMALY
D. acetoxidans       EGD TLYMAFY
C. calidirosea       TQDTLEASFW
S. acidophilus       GQRHLTVAIW
D. audaxviator       TVRQLQVTLW
M. thermoacetica     QGSSITMAIW
      :          :

```

**Supplemental Fig. 4. VanW domain amino acid sequence alignment.** Proposed catalytic triad is highlighted with red, green and blue. Gray highlight and asterisks denote strict amino acid identity, colons and periods indicate other conserved positions. Sequences shown are from *C. difficile*, *Desulforudis audaxviator*, *Moorella thermoacetica*, *Sulfobacillus acidophilus*, *Ruminiclostridium cellulolyticum*, *Gottschalkia acidurici*, *Alkaliphilus oremlandii*, *Syntrophomonas wolfeii*, *Desulforamulus ruminis*, *Desulfofarcimen acetoxidans*, and *Chthonomonas calidirosea*.

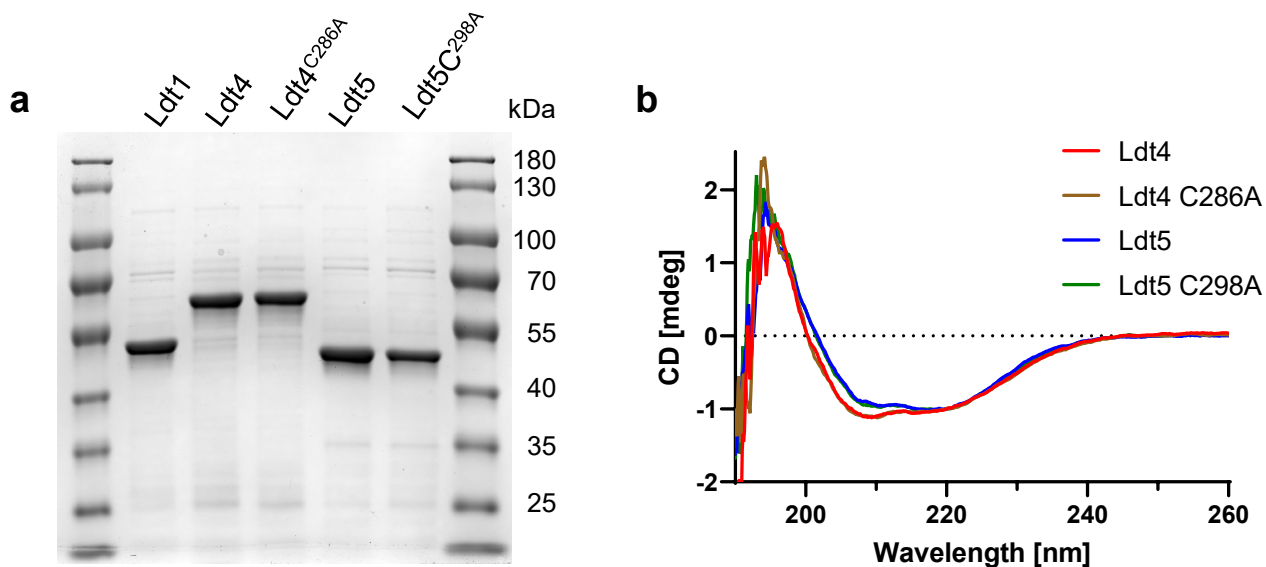

**Supplemental Fig. 5. Purified Ldts.** His-tagged Ldts without the N-terminal transmembrane region were expressed in *E. coli* and purified over a Nickel-affinity resin. **(a)** Purity determination by SDS-PAGE. About 4  $\mu\text{g}$  of purified protein were separated by 10% SDS-PAGE and stained with Coomassie Blue. Molecular mass standards are indicated to the right of the gel. Predicted molecular weights: Ldt1, 51 kD; Ldt4 54 kD; Ldt5, 45 kD. **(b)** Circular dichroism (CD) spectroscopy to evaluate protein folding. CD spectra were generated for 5  $\mu\text{M}$  enzyme and normalized to the absorbance at 220 nm. Ldts with the active site mutation showed the same degree of folding as the corresponding wild type enzyme.

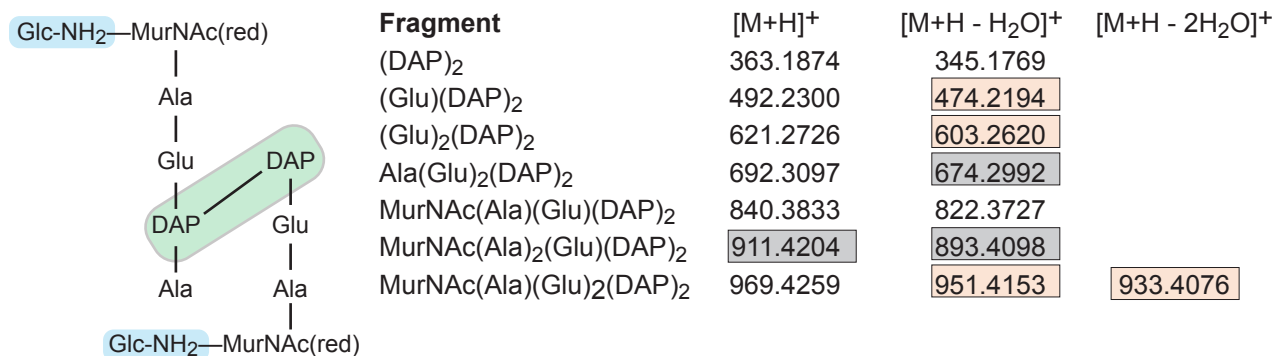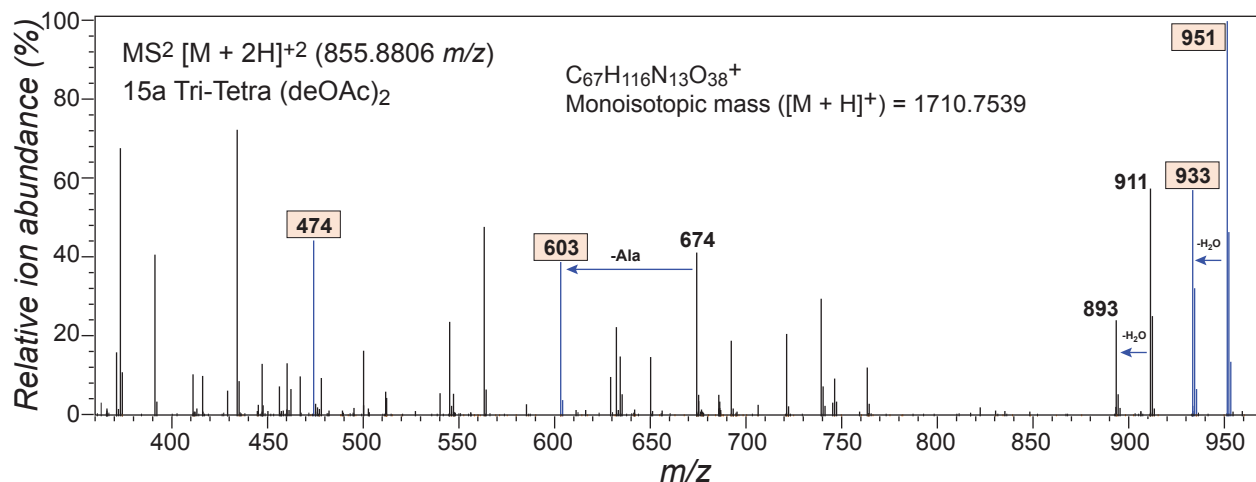

**Supplemental Fig. 6.** Structural analysis of the predominant *Ldt4* and *Ldt5* reaction product. Confirmation of the 3-3 crosslink was determined by manual interpretation of fragmentation data that solely supported DAP-DAP bonds (beige ions). The ions indicated in gray were present but not indicative of a 3-3 crosslink. While the DAP dimer (363  $m/z$ ) was observed, the ion intensity was too weak to be used for confirmation. However, ions associate with Glu and DAP (474, 603  $m/z$ ) fully supported the structure along several ions containing an intact NAM(red) moiety and only one alanine (951, 933  $m/z$ ).

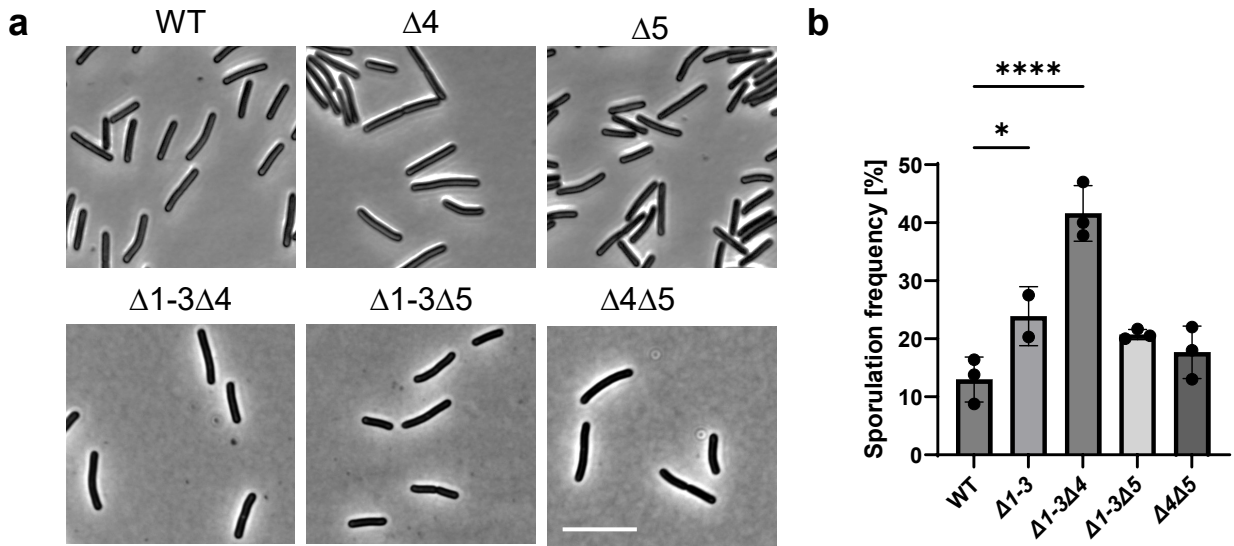

**Supplemental Fig. 7: Morphology and sporulation of *ldt* deletion mutants.** (a) Phase contrast images of strains grown to mid-log. Size bar: 10  $\mu$ m. Images are representative of at least three biological replicates. (b) Sporulation efficiency. Dots indicate the values from two or three biological replicates. Bars and error bars indicate the mean  $\pm$  s.d. \*,  $p < 0.05$ . \*\*\*\*  $p < 0.001$  in a two-way ANOVA. Frequency is calculated as the number of spores divided by the sum of spores plus vegetative cells [spores/(spores + vegetative cells)]. Strains shown: WT, R20291;  $\Delta 4$ , KB439;  $\Delta 5$ , KB440;  $\Delta 1-3\Delta 4$ , KB474 ;  $\Delta 1-3\Delta 5$ , KB502; and  $\Delta 4\Delta 5$ , KB529.



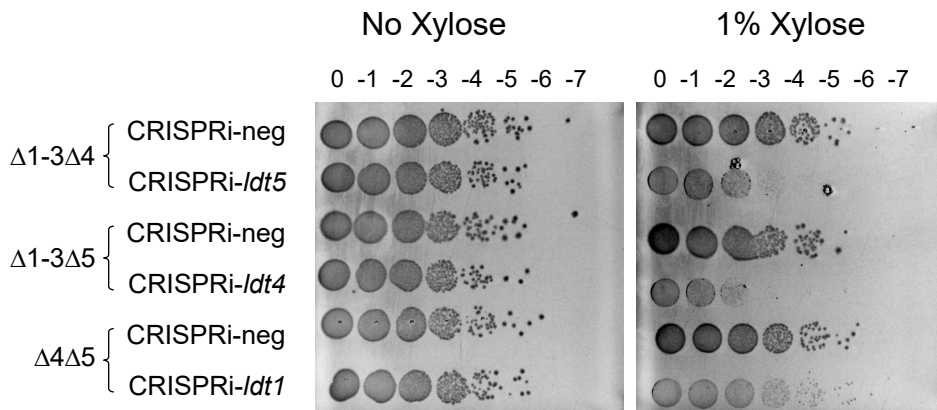

**Supplemental Fig. 8: Ldt1, Ldt4, or Ldt5 is sufficient for viability and Ldt2 plus Ldt3 are not sufficient.** CRISPRi plasmids targeting *ldt5*, *ldt4*, or *ldt1* were introduced into the indicated deletion strains. The negative control plasmid contained sgRNA against sequence not found in *C. difficile*. Serial dilutions of overnight cultures were spotted onto TY plates with or without 1% xylose, and plates were imaged after overnight incubation. Images are representative of three biological replicates. Strains shown:  $\Delta 1-3\Delta 4$ /neg, KB579;  $\Delta 1-3\Delta 4$ /CRISPRi-*ldt5*, KB508;  $\Delta 1-3\Delta 5$ /neg, KB580;  $\Delta 1-3\Delta 5$ /CRISPRi-*ldt4*, KB514 ;  $\Delta 4\Delta 5$ /neg, KB565; and  $\Delta 4\Delta 5$ /CRISPRi-*ldt1*, KB566

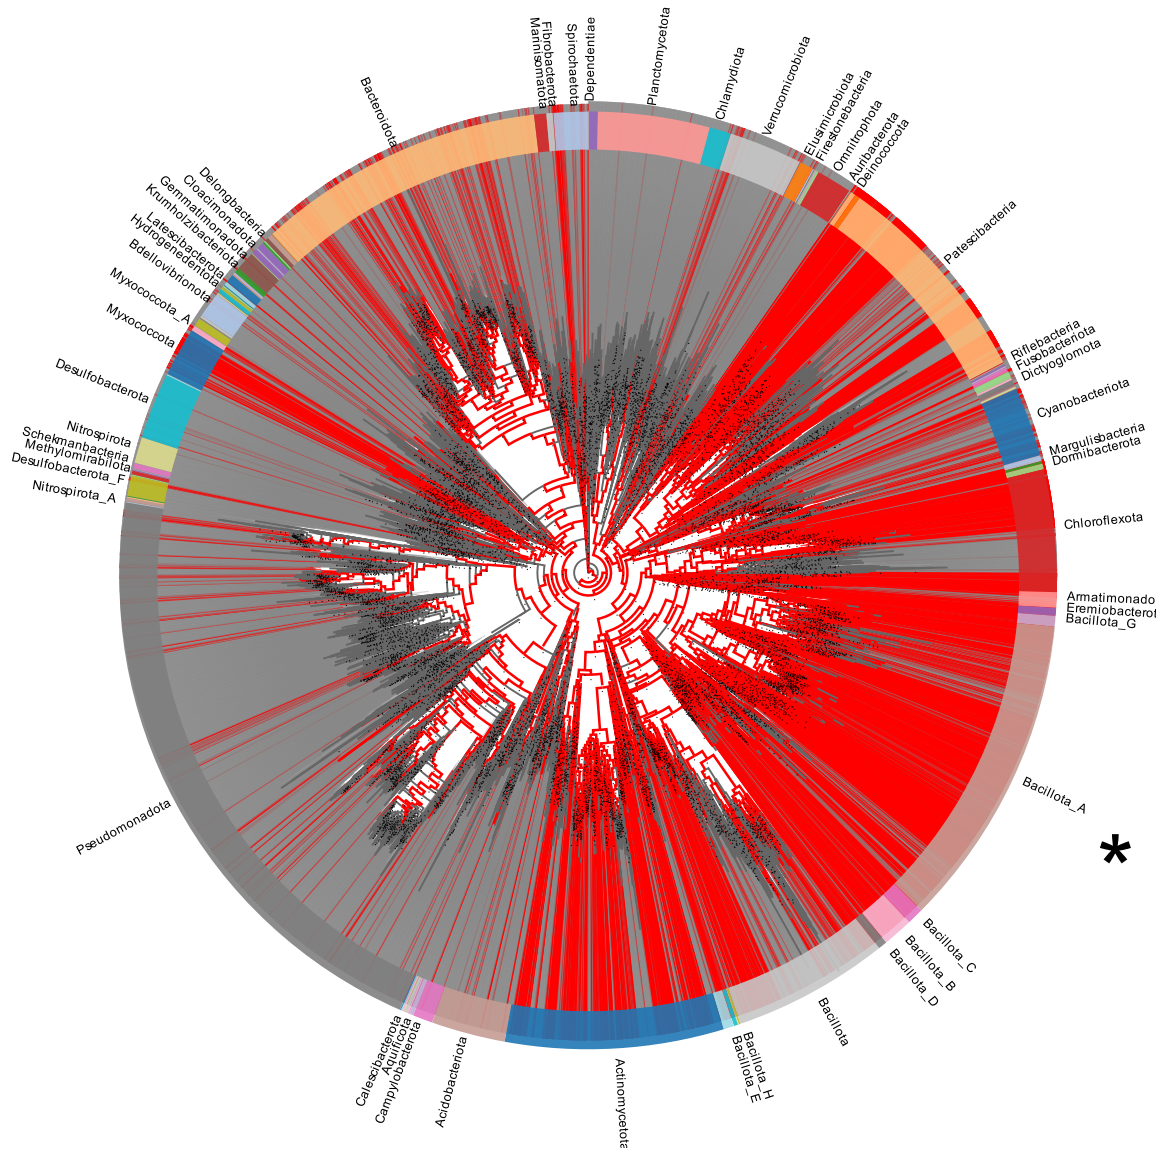

**Supplemental Fig. 9:** Taxonomic distribution of VanW domains. Red lines indicate the presence of VanW domains, gray lines the absence. Outer ring indicates bacterial phyla at the level of Class. *C. difficile* belongs to Bacillota A (asterisk). Some phyla names were pruned for clarity. Figure prepared using AnnoTree v1.3 Beta.

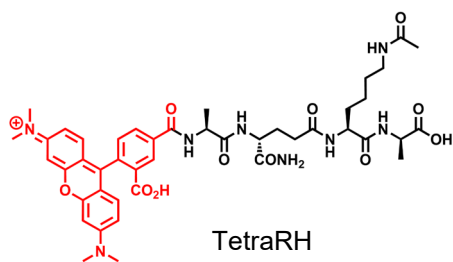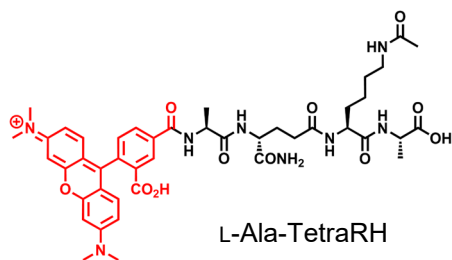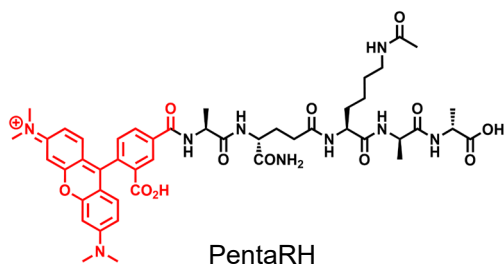

**Supplemental Fig. 10. Fluorescent substrate analogs.** TetraRH: L,D-transpeptidase specific substrate analog, Rhodamine-L-Ala-iso-D-Gln-L-Lys(Ac)-D-Ala. L-Ala-TetraRH: negative control, Rhodamine-L-Ala-iso-D-Gln-L-Lys(Ac)-L-Ala; PentaRH: PBP specific substrate analog, Rhodamine-L-Ala-iso-D-Gln-L-Lys(Ac)-D-Ala-D-Ala.

Supplemental Table 2. Strains used in this study.

| Strain and species                              | Genotype and/or description                                                                                                                                                                                                           | Alternate name                         | Source or reference |
|-------------------------------------------------|---------------------------------------------------------------------------------------------------------------------------------------------------------------------------------------------------------------------------------------|----------------------------------------|---------------------|
| <i>E. coli</i>                                  |                                                                                                                                                                                                                                       |                                        |                     |
| OmniMAX-2T1R                                    | F' [ <i>proAB+</i> <i>lacI</i> q <i>lacZ</i> ΔM15 Tn10 (Tetr) Δ( <i>ccdAB</i> )] <i>mcrA</i> Δ ( <i>mrr-hsdRMS-mcrBC</i> ) φ80( <i>lacZ</i> )ΔM15 Δ ( <i>lacZYA-argF</i> )U169 <i>endA1 recA1 supE44 thi-1 gyrA96 relA1 tonA panD</i> |                                        | Invitrogen          |
| HB101/pRK24                                     | F- <i>mcrB mrr hsdS20</i> (rB- mB-) <i>recA13 leuB6 ara - 14 proA2 lacY1 galK2 xyl-5 mtl-1 rpsL20</i>                                                                                                                                 |                                        | (1)                 |
| MG1655                                          | Wild type isolate                                                                                                                                                                                                                     |                                        | (2)                 |
| Rosetta(DE3)                                    | F' <i>ompT hsdS<sub>B</sub></i> (rB <sup>-</sup> mB <sup>-</sup> ) <i>gal dcm</i> (DE3) pRARE (Cam <sup>R</sup> )                                                                                                                     |                                        | Sigma-Aldrich       |
| KB005                                           | Rosetta(DE3)/pKB001                                                                                                                                                                                                                   |                                        | This study          |
| KB007                                           | Rosetta(DE3)/pKB003                                                                                                                                                                                                                   |                                        | This study          |
| KB008                                           | Rosetta(DE3)/pKB004                                                                                                                                                                                                                   |                                        | This study          |
| CE4771                                          | Rosetta(DE3)/pCE1169                                                                                                                                                                                                                  |                                        | This study          |
| CE4772                                          | Rosetta(DE3)/pCE1170                                                                                                                                                                                                                  |                                        | This study          |
| CE4777                                          | Rosetta(DE3)/pCE1173                                                                                                                                                                                                                  |                                        | This study          |
| CE4778                                          | Rosetta(DE3)/pCE1174                                                                                                                                                                                                                  |                                        | This study          |
|                                                 |                                                                                                                                                                                                                                       |                                        |                     |
| <i>B. subtilis</i>                              |                                                                                                                                                                                                                                       |                                        |                     |
| BS49                                            | Tn916 donor strain, Tet <sup>f</sup>                                                                                                                                                                                                  |                                        | (3)                 |
| PY79                                            | Wild type strain                                                                                                                                                                                                                      |                                        | (4)                 |
|                                                 |                                                                                                                                                                                                                                       |                                        |                     |
| <i>C. difficile</i> , all R20291 or derivatives |                                                                                                                                                                                                                                       |                                        |                     |
| R20291                                          | Wild type strain from UK outbreak (ribotype 027)                                                                                                                                                                                      |                                        | (5)                 |
| KB071                                           | Δ <i>ldt1</i>                                                                                                                                                                                                                         |                                        | This study          |
| KB075                                           | Δ <i>ldt2</i>                                                                                                                                                                                                                         |                                        | This study          |
| KB130                                           | Δ <i>ldt3</i>                                                                                                                                                                                                                         |                                        | This study          |
| KB103                                           | Δ <i>ldt1</i> Δ <i>ldt2</i>                                                                                                                                                                                                           |                                        | This study          |
| KB139                                           | Δ <i>ldt1</i> Δ <i>ldt3</i>                                                                                                                                                                                                           |                                        | This study          |
| KB166                                           | Δ <i>ldt2</i> Δ <i>ldt3</i>                                                                                                                                                                                                           |                                        | This study          |
| KB124                                           | Δ <i>ldt1</i> Δ <i>ldt2</i> Δ <i>ldt3</i>                                                                                                                                                                                             | Δ1-3                                   | This study          |
| KB464                                           | R20291/pBZ101                                                                                                                                                                                                                         |                                        | This study          |
| KB465                                           | Δ1-3/pBZ101                                                                                                                                                                                                                           |                                        | This study          |
| KB154                                           | Δ1-3/pCE0938                                                                                                                                                                                                                          |                                        | This study          |
| KB181                                           | Δ1-3/pCE0983                                                                                                                                                                                                                          |                                        | This study          |
| KB210                                           | Δ1-3/pKB025                                                                                                                                                                                                                           |                                        | This study          |
| KB439                                           | Δ <i>ldt4</i>                                                                                                                                                                                                                         | Δ4                                     | This study          |
| KB440                                           | Δ <i>ldt5</i>                                                                                                                                                                                                                         | Δ5                                     | This study          |
| KB474                                           | Δ <i>ldt1</i> Δ <i>ldt2</i> Δ <i>ldt3</i> Δ <i>ldt4</i>                                                                                                                                                                               | Δ1-3Δ4                                 | This study          |
| KB502                                           | Δ <i>ldt1</i> Δ <i>ldt2</i> Δ <i>ldt3</i> Δ <i>ldt5</i>                                                                                                                                                                               | Δ1-3Δ5                                 | This study          |
| KB529                                           | Δ <i>ldt4</i> Δ <i>ldt5</i>                                                                                                                                                                                                           | Δ4Δ5                                   | This study          |
| KB547                                           | Δ <i>ldt1</i> -3Δ <i>ldt4</i> P <sub>tet</sub> :: <i>ldt5</i>                                                                                                                                                                         | Δ1-3Δ4 P <sub>tet</sub> :: <i>ldt5</i> | This study          |
| KB548                                           | Δ1-3Δ4 P <sub>tet</sub> :: <i>ldt5</i> /pBZ101                                                                                                                                                                                        |                                        | This study          |
| KB549                                           | Δ1-3Δ4 P <sub>tet</sub> :: <i>ldt5</i> /pKB025                                                                                                                                                                                        |                                        | This study          |
| KB550                                           | Δ1-3Δ4 P <sub>tet</sub> :: <i>ldt5</i> /pCE0938                                                                                                                                                                                       |                                        | This study          |
| KB551                                           | Δ1-3Δ4 P <sub>tet</sub> :: <i>ldt5</i> /pCE0983                                                                                                                                                                                       |                                        | This study          |
| KB552                                           | Δ1-3Δ4 P <sub>tet</sub> :: <i>ldt5</i> /pCE1175                                                                                                                                                                                       |                                        | This study          |
| KB553                                           | Δ1-3Δ4 P <sub>tet</sub> :: <i>ldt5</i> /pCE1176                                                                                                                                                                                       |                                        | This study          |

Supplemental Table 2. Strains used in this study.

| <b>Strain and species</b> | <b>Genotype and/or description</b> | <b>Alternate name</b> | <b>Source or reference</b> |
|---------------------------|------------------------------------|-----------------------|----------------------------|
| KB508                     | $\Delta 1-3\Delta 4$ /pKB081       |                       | This study                 |
| KB514                     | $\Delta 1-3\Delta 5$ /pKB083       |                       | This study                 |
| KB566                     | $\Delta 4\Delta 5$ /pIA68          |                       | This study                 |
| KB565                     | $\Delta 4\Delta 5$ /pIA34          |                       | This study                 |
| KB579                     | $\Delta 1-3\Delta 4$ /pIA34        |                       | This study                 |
| KB580                     | $\Delta 1-3\Delta 5$ /pIA34        |                       | This study                 |
| KB633                     | $\Delta 1-3\Delta 4$ /pBZ101       |                       | This study                 |
| KB634                     | $\Delta 1-3\Delta 4$ /pCE1176      |                       | This study                 |
| KB635                     | $\Delta 1-3\Delta 4$ /pCE1186      |                       | This study                 |
| KB636                     | $\Delta 1-3\Delta 4$ /pCE1191      |                       | This study                 |
| KB637                     | $\Delta 1-3\Delta 4$ /pCE1198      |                       | This study                 |
| KB638                     | $\Delta 1-3\Delta 4$ /pCE1199      |                       | This study                 |
| KB639                     | $\Delta 1-3\Delta 4$ /pCE1200      |                       | This study                 |
| KB640                     | $\Delta 1-3\Delta 4$ /pCE1201      |                       | This study                 |
| KB641                     | $\Delta 1-3\Delta 4$ /pCE1202      |                       | This study                 |

Supplemental Table 3. Plasmids used in this study.

| Plasmid           | Relevant features                                                                                        | Parent vector     | Restriction enzymes to digest parent | PCR primers                         | PCR template                                | Assembly         | Comments                                                                                                                         | Reference  |
|-------------------|----------------------------------------------------------------------------------------------------------|-------------------|--------------------------------------|-------------------------------------|---------------------------------------------|------------------|----------------------------------------------------------------------------------------------------------------------------------|------------|
| pAP114            | $P_{xyI}::mCherryOpt\ catP$                                                                              |                   |                                      |                                     |                                             |                  | Parent plasmid for cloning under $P_{xyI}$ control                                                                               | (6)        |
| pBZ101            | $P_{xyI}$ empty vector $catP$                                                                            |                   |                                      |                                     |                                             |                  | Empty vector control for $P_{xyI}$ induction                                                                                     | (7)        |
| pCE678            | $P_{xyI}::Cas9-opt\ P_{gdh}::sgRNA-pgdA-2$ , homology to delete $pgdA\ catP$                             |                   |                                      |                                     |                                             |                  | Parent plasmid for CRISPR editing                                                                                                | (8)        |
| pCE938            | $P_{xyI}::ldt2\ catP$                                                                                    | pAP114            | BamHI, SacI                          | 5609+5610                           | R20291                                      | ITA <sup>1</sup> | <i>cdr_2601 (ldt2)</i> from <i>C. difficile</i> R20291 under xylose control                                                      | This study |
| pCE983            | $P_{xyI}::ldt3\ catP$                                                                                    | pAP114            | BamHI, SacI                          | 6243+5612                           | R20291                                      | ITA              | <i>cdr_2843 (ldt3)</i> from <i>C. difficile</i> R20291 under xylose control                                                      | This study |
| pCE1169           | $P_{tac}::6xHis-ldt4^{28-489}\ ampR$                                                                     | pET21a-6xHis-rTEV | NcoI, EcoRI                          | 6875+6876                           | R20291                                      | ITA              | Expression plasmid: N-terminal His tagged Ldt4 <sup>28-489</sup> , no transmembrane region                                       | This study |
| pCE1170           | $P_{tac}::6xHis-ldt5^{38-419}\ ampR$                                                                     | pET21a-6xHis-rTEV | NcoI, EcoRI                          | 6878+6879                           | R20291                                      | ITA              | Expression plasmid: N-terminal His tagged Ldt5 <sup>38-419</sup> , no transmembrane region                                       | This study |
| pCE1172           | $P_{xyI}::Cas9\ P_{gdh}::sgRNA-cdr\_985$ , homology region to replace $P_{ldt5}$ with $P_{tet}$ , $catP$ | pIA123            | PstI                                 | 6886+6887<br>6888+6889<br>6890+6891 | R20291<br>R20291<br>pRPF185                 | ITA              | Plasmid intermediate: inserts homology regions to replace $P_{ldt5}$ with $P_{tet}$ into CRISPR editing plasmid pIA123           | This study |
| pCE1173           | $P_{tac}::6xHis-ldt4^{28-489}\ C286A\ ampR$                                                              | pET21a-6xHis-rTEV | NcoI, EcoRI                          | 6875+6897<br>6896+6876              | R20291<br>R20291                            | ITA              | Expression plasmid: N-terminal His tagged Ldt4 <sup>28-489</sup> catalytic mutant C286A, no transmembrane region                 | This study |
| pCE1174           | $P_{tac}::6xHis-ldt5^{38-419}\ C298A\ ampR$                                                              | pET21a-6xHis-rTEV | NcoI, EcoRI                          | 6878+6899<br>6898+6879              | R20291<br>R20291                            | ITA              | Expression plasmid: N-terminal His tagged Ldt5 <sup>38-419</sup> catalytic mutant C298A, no transmembrane region                 | This study |
| pCE1175           | $P_{xyI}::ldt4\ catP$                                                                                    | pAP114            | BamHI, SacI                          | 6892+6893                           | R20291                                      | ITA              | <i>cdr_1285 (ldt4)</i> from <i>C. difficile</i> R20291 under xylose control                                                      | This study |
| pCE1176           | $P_{xyI}::ldt5\ catP$                                                                                    | pAP114            | BamHI, SacI                          | 6894+6895                           | R20291                                      | ITA              | <i>cdr_2055 (ldt5)</i> from <i>C. difficile</i> R20291 under xylose control                                                      | This study |
| pCE1180           | $P_{xyI}::Cas9\ P_{gdh}::sgRNA-ldt5$ , homology region to replace $P_{ldt5}$ with $P_{tet}$ , $catP$     | pCE1172           | MscI, MluI                           | 6906+4237                           | pIA33                                       | ITA              | Vector suitable for CRISPR replacing $P_{ldt5}$ with $P_{tet}$ ; replaces <i>sgRNA-cdr_985</i> with <i>sgRNA-ldt5</i> in pCE1172 | This study |
| pCE1186           | $P_{xyI}::yoaR$                                                                                          | pAP114            | BamHI, SacI                          | 6922+6923                           | <i>Bacillus subtilis</i> PY79               | ITA              | <i>yoaR</i> from <i>Bacillus subtilis</i> PY79 under xylose control                                                              | This study |
| pCE1191           | $P_{xyI}::vanW_{Er}$                                                                                     | pAP114            | BamHI, SacI                          | 6932+6933                           | <i>Enterococcus faecalis</i> V583           | ITA              | <i>vanW</i> from <i>Enterococcus faecalis</i> V583 under xylose control                                                          | This study |
| pCE1198           | $P_{xyI}::vanW_{Pb}$                                                                                     | pAP114            | BamHI, SacI                          | 7013+7014                           | <i>Paraclostridium bifermentans</i> 638     | ITA              | <i>vanW</i> (WP_021433578) from <i>Paraclostridium bifermentans</i> 638 under xylose control                                     | This study |
| pCE1199           | $P_{xyI}::vanW_{Rum}$                                                                                    | pAP114            | BamHI, SacI                          | 7015+7016                           | <i>Ruminococcaceae bacterium</i> D16        | ITA              | <i>vanW</i> (HMPREF0866_01899) from <i>Ruminococcaceae bacterium</i> D16 under xylose control                                    | This study |
| pCE1200           | $P_{xyI}::vanW_{Lac}$                                                                                    | pAP114            | BamHI, SacI                          | 7017+7018                           | <i>Lachnospiraceae bacterium</i> 5_1_57FAA  | ITA              | <i>vanW</i> (HMPREF0993_00855) from <i>Lachnospiraceae bacterium</i> 5_1_57FAA under xylose control                              | This study |
| pCE1201           | $P_{xyI}::vanW_{Pep0521}$                                                                                | pAP114            | BamHI, SacI                          | 7021+7022                           | <i>Peptostreptococcaceae bacterium</i> AS15 | ITA              | <i>vanW</i> (HMPREF1142_0521) from <i>Peptostreptococcaceae bacterium</i> AS15                                                   | This study |
| pCE1202           | $P_{xyI}::vanW_{Pep1713}$                                                                                | pAP114            | BamHI, SacI                          | 7023+7024                           | <i>Peptostreptococcaceae bacterium</i> AS15 | ITA              | <i>vanW</i> (HMPREF1142_1713) from <i>Peptostreptococcaceae bacterium</i> AS15                                                   | This study |
| pET21a-6xHis-rTEV |                                                                                                          |                   |                                      |                                     |                                             |                  | pET21a vector (Novagen) with N-terminal His6 tag and tobacco etch virus (rTEV) protease cleavage site                            | (9)        |
| pCI5492           | $P_{xyI}::dCas9-opt\ P_{gdh}::sgRNA-cdr\_985$                                                            | pIA33             | MscI, NotI                           | 5492+4084                           | pIA33                                       | ITA              | CRISPRi against <i>cdr_985 (pbp2)</i>                                                                                            | This Study |
| pIA33             | $P_{xyI}::dCas9-opt\ P_{gdh}::sgRNA-rfp\ catP$                                                           |                   |                                      |                                     |                                             |                  | Parent plasmid for CRISPRi constructs                                                                                            | (6)        |
| pIA34             | $P_{xyI}::dCas9-opt\ P_{gdh}::gRNA-neg$                                                                  |                   |                                      |                                     |                                             |                  | CRISPRi negative control plasmid                                                                                                 | (6)        |

Supplemental Table 3. Plasmids used in this study.

| Plasmid | Relevant features                                                               | Parent vector     | Restriction enzymes to digest parent | PCR primers          | PCR template     | Assembly | Comments                                                                                              | Reference  |
|---------|---------------------------------------------------------------------------------|-------------------|--------------------------------------|----------------------|------------------|----------|-------------------------------------------------------------------------------------------------------|------------|
| pIA68   | $P_{xyI}::dCas9-opt P_{gdh}::sgRNA-ldt1$                                        | pIA34             | MscI, MluI                           |                      | pIA33            | ITA      | CRISPRi against <i>ldt1</i>                                                                           | This study |
| pIA123  | $P_{xyI}::Cas9 P_{gdh}::sgRNA-cdr\_985 catP$                                    | pCI5492           | Sall, XhoI                           | 6269+6270            | pCE678           | ITA      | CRISPR editing parent plasmid; sgRNA- <i>cdr_985 (bbp2)</i> ; no homology region                      | This study |
| pKB001  | $P_{tac}::6xHis-ldt1^{38-469} ampR$                                             | pET21a-6xHis-rTEV | NcoI, EcoRI                          | 5467+5468            | R20291           | ITA      | Expression plasmid: N-terminal 6x His tag on <i>Ldt1</i> <sup>38-469</sup> , no transmembrane section | This study |
| pKB003  | $P_{tac}::6xHis-ldt2^{38-617} ampR$                                             | pET21a-6xHis-rTEV | NcoI, EcoRI                          | 5471+5472            | R20291           | ITA      | Expression plasmid: N-terminal His tagged <i>Ldt2</i> <sup>38-617</sup> , no transmembrane region     | This study |
| pKB004  | $P_{tac}::6xHis-ldt3^{7-289} ampR$                                              | pET21a-6xHis-rTEV | NcoI, EcoRI                          | 5473+5474            | R20291           | ITA      | Expression plasmid: N-terminal His tagged <i>Ldt3</i> <sup>7-289</sup> , no transmembrane region      | This study |
| pKB007  | $P_{xyI}::Cas9-opt P_{gdh}::sgRNA-pgdA-2$ , homology to delete <i>ldt2 catP</i> | pCE678            | NotI, XhoI                           | 5541+5542, 5543+5544 | R20291<br>R20291 | ITA      | Plasmid intermediate to build <i>ldt2</i> deletion plasmid                                            | This study |
| pKB009  | $P_{xyI}::Cas9-opt P_{gdh}::sgRNA-pgdA-2$ , homology to delete <i>ldt3 catP</i> | pCE678            | NotI, XhoI                           | 5463+5464, 5465+5466 | R20291<br>R20291 | ITA      | Plasmid intermediate to build <i>ldt3</i> deletion plasmid                                            | This study |
| pKB015  | $P_{xyI}::Cas9-opt P_{gdh}::sgRNA-pgdA-2$ , homology to delete <i>ldt1 catP</i> | pCE678            | NotI, XhoI                           | 5459+5460, 5461+5462 | R20291<br>R20291 | ITA      | Plasmid intermediate to build <i>ldt1</i> deletion plasmid                                            | This study |
| pKB019  | $P_{xyI}::Cas9-opt P_{gdh}::sgRNA-ldt1$ , homology to delete <i>ldt1 catP</i>   | pKB15             | MscI, MluI                           | 5448+4237            | pCE678           | ITA      | CRISPR edit plasmid to delete <i>ldt1</i>                                                             | This study |
| pKB022  | $P_{xyI}::Cas9-opt P_{gdh}::sgRNA-ldt2$ , homology to delete <i>ldt2 catP</i>   | pKB07             | MscI, MluI                           | 5540+4237            | pCE678           | ITA      | CRISPR edit plasmid to delete <i>ldt2</i>                                                             | This study |
| pKB024  | $P_{xyI}::Cas9-opt P_{gdh}::sgRNA-ldt3$ , homology to delete <i>ldt3 catP</i>   | pKB09             | MscI, MluI                           | 5456+4237            | pCE678           | ITA      | CRISPR edit plasmid to delete <i>ldt3</i>                                                             | This study |
| pKB025  | $P_{xyI}::ldt1 catP$                                                            | pAP114            | BamHI, SacI                          | 5607+5608            | R20291           | ITA      | <i>cdr_2797 (ldt1)</i> from <i>C. difficile</i> R20291 under xylose control                           | This study |
| pKB067  | $P_{xyI}::Cas9 P_{gdh}::sgRNA-cdr\_985$ , homology to delete <i>ldt5 catP</i>   | pIA123            | PstI                                 | 6737+6738, 6739+6740 | R20291<br>R20291 | ITA      | Plasmid intermediate to build <i>ldt5</i> deletion plasmid                                            | This study |
| pKB068  | $P_{xyI}::Cas9 P_{gdh}::sgRNA-cdr\_985$ , homology to delete <i>ldt4 catP</i>   | pIA123            | PstI                                 | 6733+6734, 6735+6736 | R20291<br>R20291 | ITA      | Plasmid intermediate to build <i>ldt4</i> deletion plasmid                                            | This study |
| pKB071  | $P_{xyI}::Cas9 P_{gdh}::sgRNA-ldt5$ , homology to delete <i>ldt5 catP</i>       | pKB67             | MscI, MluI                           | 6780+4237            | pIA123           | ITA      | CRISPR edit plasmid to delete <i>ldt5</i>                                                             | This study |
| pKB073  | $P_{xyI}::Cas9 P_{gdh}::sgRNA-ldt4$ , homology to delete <i>ldt4 catP</i>       | pKB68             | MscI, MluI                           | 6774+4237            | pIA123           | ITA      | CRISPR edit plasmid to delete <i>ldt4</i>                                                             | This study |
| pKB081  | $P_{xyI}::dCas9-opt P_{gdh}::sgRNA-ldt5$                                        | pIA34             | MscI, MluI                           | 6865+4237            | pIA34            | ITA      | CRISPRi against <i>ldt5</i>                                                                           | This study |
| pKB083  | $P_{xyI}::dCas9-opt P_{gdh}::sgRNA-ldt4$                                        | pIA34             | MscI, MluI                           | 6871+4237            | pIA34            | ITA      | CRISPRi against <i>ldt4</i>                                                                           | This study |
| pRPF185 | $P_{tet}::gusA$                                                                 |                   |                                      |                      |                  |          | Source of $P_{tet}$                                                                                   | (10)       |

<sup>1</sup>: Isothermal assembly

Supplemental Table 4. Oligonucleotides used in this study.

| Oligo | Sequence                                                           | Use     |
|-------|--------------------------------------------------------------------|---------|
| 4084  | AACTTATAGGATCCGCGGCCGCTAGTCAGACATCATGCTGATCTAGA                    | Cloning |
| 4237  | CTTATAGGATCCGCGGCCGCTAG                                            | Cloning |
| 5448  | AATTAACCTGTAATGGCCAAATGTAATATCTTTACCTG GTTTTAGAGCTAGAAATAGC        | Cloning |
| 5456  | AATTAACCTGTAATGGCCAAATTTTTAAGAAAGATAATGG GTTTTAGAGCTAGAAATAGC      | Cloning |
| 5459  | AAACAGCTATGACC GCGGCCGCGTTGAAGACATTACGAAACTAG                      | Cloning |
| 5460  | AACTGTTAGCAACACATTTAAATTAATCCTTCCTTACATTG                          | Cloning |
| 5461  | ATGTAAGGAAGGATTAATTTAAATGTGTTGCTAACAGTT                            | Cloning |
| 5462  | TTATTTTTATGCTAGCTCGAGCCTCATTGTTAAAGTATAAACA                        | Cloning |
| 5463  | AAACAGCTATGACC GCGGCCGCGTTAAAAGGTGAAATAATCTGT                      | Cloning |
| 5466  | TTATTTTTATGCTAGCTCGAGAGACTATGAAGGTATCAAC                           | Cloning |
| 5467  | TGTATTTTCAGGGCGCCATGAGAAATCATTTTTACTTTGGA                          | Cloning |
| 5468  | TCGACGTAGGCCTTTGAATTCTAGTATAAAATAATTGGTGACC                        | Cloning |
| 5471  | TGTATTTTCAGGGCGCCATGAGTAAACATGTGATTATAGTAAA                        | Cloning |
| 5472  | TCGACGTAGGCCTTTGAATTCTATTTTGAAGAATATCCA                            | Cloning |
| 5473  | TGTATTTTCAGGGCGCCATGAAATTAATACTAACTAAATATTAATAAATA                 | Cloning |
| 5474  | TCGACGTAGGCCTTTGAATTTAATGAATTATAACTGTTGTTG                         | Cloning |
| 5492  | AATTAACCTGTAATGGCCACTGCTATTGAAACACCAACA GTTTTAGAGCTAGAAATAGC       | Cloning |
| 5540  | AATTAACCTGTAATGGCCACTATAATTGTATCCCATGT GTTTTAGAGCTAGAAATAGC        | Cloning |
| 5541  | AAACAGCTATGACC GCGGCCGCAACTCAATAGTGGTTGAT                          | Cloning |
| 5542  | TTTTTCAATATATATTTTTATACTACATGTGTCTAATTATAACAT                      | Cloning |
| 5543  | ATAATTAGACACATGTAGTATAAAAAATATATTTGAAAAATAATTATAATTGAG             | Cloning |
| 5544  | TTATTTTTATGCTAGCTCGAGGCTCTACAATAGGAACTTC                           | Cloning |
| 5607  | CGATAGTTATGAAGTGAGCTGTAAGGAAGGATTAATTATGATTGATG                    | Cloning |
| 5608  | TTATTAATACTTATAGGATCCTTCGCTTAACTGTTAGCAAC                          | Cloning |
| 5609  | CGATAGTTATGAAGTGAGCTTAAGGAGGATGTAGTAATGTTTCTAAAAGAGGGGGA           | Cloning |
| 5610  | TTTTTATAAACTTATAGGATCCACATCTCAATTATAATTTTCAATATATATTTTTACTATTTTGCA | Cloning |
| 5612  | AGTTTTTATAAACTTATAGGATCTTGAGAACTTATCCCAATAAAAACTC                  | Cloning |
| 6243  | AGATACCATAGATCCGGTACCATGAATTATAACTGTTGTTGTATCTG                    | Cloning |
| 6269  | AGGAGGGTAAAGAGGAGAGTTCGACGCATGGATAAAAAATATAGTATAGGATTAGATATAG      | Cloning |
| 6270  | CCGATTTTCTACGATGTTTTTCTCGAGTTAATCACCACCTAATTGAGATAAA               | Cloning |
| 6733  | CAGGAAGGGCGAATTCTGCATGGTAAGTGCAAAAACTAAA                           | Cloning |
| 6736  | GAGACCGGTCAGATCTGCACCTTGTTTATAAAGTTCATCTAGT                        | Cloning |
| 6737  | CAGGAAGGGCGAATTCTGCAAAAACAATTAGACGAAATAATAGA                       | Cloning |
| 6738  | ATATTTCTCTAAAAAATTATAACTTCACCTCATTTTGACA                           | Cloning |
| 6739  | TGTCAAAAAGGTTGAAGTTATAATTTTTTAGAGAAATTTGTAATAT                     | Cloning |
| 6740  | GAGACCGGTCAGATCTGCACACATCTATTATTTTTAGTATATAAGGA                    | Cloning |
| 6774  | AATTAACCTGTAATGGCCAAATGTGCATGCAATTTAAAG GTTTTAGAGCTAGAAATAGC       | Cloning |
| 6780  | AATTAACCTGTAATGGCCATTGTATGAAAATTTCTTACC GTTTTAGAGCTAGAAATAGC       | Cloning |
| 6865  | AATTAACCTGTAATGGCCATAAGTAAGATTTAAGTCTTC GTTTTAGAGCTAGAAATAGC       | Cloning |
| 6871  | AATTAACCTGTAATGGCCAAATTTAAGACCATCAGAATC GTTTTAGAGCTAGAAATAGC       | Cloning |
| 6875  | TGTATTTTCAGGGCGCCATGATGCAATTTAAAGGGGAGAAAA                         | Cloning |
| 6876  | AGGCCTTTGAATTCCGGATCTTAAGCTTGCGGTTGTGGTT                           | Cloning |
| 6878  | TGTATTTTCAGGGCGCCATGAACAGTAAATTTCTGTACAATGGG                       | Cloning |
| 6879  | AGGCCTTTGAATTCCGGATCCTATTTTTTAATTTCTTATAAGAACTATTTGATAT            | Cloning |
| 6886  | CAGGAAGGGCGAATTCTGCATTTTAGCTTTAAAAGCTGTT                           | Cloning |
| 6887  | GCTTCTATTTTTATGCTAGAATTTAAATGTAACCTATTACAGG                        | Cloning |
| 6888  | AGCGTTAACAGATCTGAGCTAAATGAGGTGAAGTTATGGG                           | Cloning |
| 6889  | CCGGTCAGATCTGCACTGCATTTTTCATCTTAACATTTATACTATC                     | Cloning |
| 6890  | TAATAGGTTACATTTAAATTTCTAGCATAAAAATAAGAAGCCTGC                      | Cloning |
| 6891  | CCATAAATTCACCTCATTTAGCTCAGATCTGTTAACGCT                            | Cloning |
| 6892  | CGATAGTTATGAAGTGAGCTAAGGAGAGTATGGGATGAGTAATGTGAACAAA               | Cloning |
| 6893  | TTATTAATACTTATAGGATCTTAAGCTTGCGGTTGTGGTT                           | Cloning |
| 6894  | CGATAGTTATGAAGTGAGCTAAGGAGGTGAAGTTATGGGCAGAAGA                     | Cloning |
| 6895  | TTATTAATACTTATAGGATCCTATTTTTTAATTTCTTATAAGAACTATTTG                | Cloning |
| 6896  | GAGATTATGGTGGAGGAGTTGCCCAAGTTTCATCTACG                             | Cloning |
| 6897  | GATGAAACTTGGGCAACTCCTCCACCATAATCTTCTTCC                            | Cloning |
| 6898  | CAGCAGGAGGAGGTGTTGCCCAACATCTTCAACAGTTTA                            | Cloning |
| 6899  | CTGTTGAAGATGTTTGGGCAACACCTCCTCCTGCTGATTG                           | Cloning |
| 6906  | AATTAACCTGTAATGGCCA AGCTATTTCAAAATATAATCTA GTTTTAGAGCTAGAAATAGC    | Cloning |
| 6922  | CGATAGTTATGAAGTGAGCTAAGGAGACCGACTTATGATACAAATTTTGATC               | Cloning |
| 6923  | TTATTAATACTTATAGGATCTTACTGCTCTGCATTTATTTCT                         | Cloning |
| 6932  | CGATAGTTATGAAGTGAGCTAAGGAGATAATGCTATGAACAGAAAAAGATTGAC             | Cloning |



Supplemental Table 4. Oligonucleotides used in this study.

| Oligo | Sequence                                                      | Use                        |
|-------|---------------------------------------------------------------|----------------------------|
| 6933  | TTATTA AAACTTATAGGATCTCATTGGTTCGCCTCCTGAA                     | Cloning                    |
| 7013  | CGATAGTTATGAAGTGAGCTCTAAGGAGGGGAATGAAATGCAACAAAATGTAGCAGTA    | Cloning                    |
| 7014  | TTATTA AAACTTATAGGATCCTTATTTTTTCTGTACGAGCTTGT                 | Cloning                    |
| 7015  | CGATAGTTATGAAGTGAGCTCTAAGGAGGAACGTCATATGGAAGGTAGTCGGGTCCAA    | Cloning                    |
| 7016  | TTATTA AAACTTATAGGATCCTCAGGATGCCTGACTGCTGGC                   | Cloning                    |
| 7017  | CGATAGTTATGAAGTGAGCTCTAAGGAGGAGAATAAGATGGCTGCAGGAAGTCAGAGA    | Cloning                    |
| 7018  | TTATTA AAACTTATAGGATCCTTACTGTGCCGGCTGTACCTG                   | Cloning                    |
| 7021  | CGATAGTTATGAAGTGAGCTCTAAGGAGGTCAGCTAAATGATTATTGTAATTATTATAAGA | Cloning                    |
| 7022  | TTATTA AAACTTATAGGATCCTTAAAAATACTACATTAGAATCTGATGTTTCTGT      | Cloning                    |
| 7023  | CGATAGTTATGAAGTGAGCTCTAAGGAGGATGATTTTTGCAACTTCTCAAAAACTC      | Cloning                    |
| 7024  | TTATTA AAACTTATAGGATCCTTACTGTCTTGAATACCAATCGC                 | Cloning                    |
| 5465  | AAAATGTTGTAAAAAGACATGAAAAATTTGAGTTTTTATTGG                    | Cloning                    |
| 5464  | ATAAAAACTCAAAATTTTTCATGTCTTTTACAACATTTTATG                    | Cloning                    |
| 6734  | AAATCCTATTCTTGAGAACTCCCATACTTCTCCTTACAAT                      | Cloning                    |
| 6735  | ATTGTAAGGAGAAGTATGGGAGTTCTCAAGAATAGGATT                       | Cloning                    |
| 5599  | AAGGGATTTTAAAAGGGGTG                                          | Check <i>ldt1</i> deletion |
| 5600  | CTGTCGGTGACTGCCTTCTC                                          | Check <i>ldt1</i> deletion |
| 5601  | AGTAGCTGGAGGAGCAGGAT                                          | Check <i>ldt2</i> deletion |
| 5602  | CCTGTCAATGTAATGGGTC                                           | Check <i>ldt2</i> deletion |
| 5603  | GCCAAA ACTTGGGGAATTGA                                         | Check <i>ldt3</i> deletion |
| 5604  | GGTTCTCCACAAGACTGTGG                                          | Check <i>ldt3</i> deletion |
| 6808  | GCTGAAGAGGCAAATACTTCTGG                                       | Check <i>ldt4</i> deletion |
| 6809  | CCACCATTCTCATAATAAAAAAGGTAATCC                                | Check <i>ldt4</i> deletion |
| 6810  | CGGGGAGCTCTTTGTATAACTATAGATGC                                 | Check <i>ldt5</i> deletion |
| 6811  | CCCATTATTTGCTTTTGAATTCC                                       | Check <i>ldt5</i> deletion |

## References Supplemental Information

- 1 Trieu-Cuot, P., Carlier, C., Poyart-Salmeron, C. & Courvalin, P. Shuttle vectors containing a multiple cloning site and a lacZ alpha gene for conjugal transfer of DNA from *Escherichia coli* to gram-positive bacteria. *Gene* **102**, 99-104 (1991). [https://doi.org:10.1016/0378-1119\(91\)90546-n](https://doi.org:10.1016/0378-1119(91)90546-n)
- 2 Arends, S. J. & Weiss, D. S. Inhibiting cell division in *Escherichia coli* has little if any effect on gene expression. *Journal of bacteriology* **186**, 880-884 (2004). <https://doi.org:10.1128/jb.186.3.880-884.2004>
- 3 Christie, P. J., Korman, R. Z., Zahler, S. A., Adsit, J. C. & Dunny, G. M. Two conjugation systems associated with *Streptococcus faecalis* plasmid pCF10: identification of a conjugative transposon that transfers between *S. faecalis* and *Bacillus subtilis*. *Journal of bacteriology* **169**, 2529-2536 (1987). <https://doi.org:10.1128/jb.169.6.2529-2536.1987>
- 4 Youngman, P., Perkins, J. B. & Losick, R. Construction of a cloning site near one end of Tn917 into which foreign DNA may be inserted without affecting transposition in *Bacillus subtilis* or expression of the transposon-borne *erm* gene. *Plasmid* **12**, 1-9 (1984). [https://doi.org:10.1016/0147-619x\(84\)90061-1](https://doi.org:10.1016/0147-619x(84)90061-1)
- 5 Stabler, R. A. *et al.* Comparative genome and phenotypic analysis of *Clostridium difficile* 027 strains provides insight into the evolution of a hypervirulent bacterium. *Genome biology* **10**, R102 (2009). <https://doi.org:10.1186/gb-2009-10-9-r102>
- 6 Müh, U., Pannullo, A. G., Weiss, D. S. & Ellermeier, C. D. A Xylose-Inducible Expression System and a CRISPR Interference Plasmid for Targeted Knockdown of Gene Expression in *Clostridioides difficile*. *Journal of bacteriology* **201**, e00711-00718 (2019). <https://doi.org:10.1128/JB.00711-18>
- 7 Kaus, G. M. *et al.* Lysozyme Resistance in *Clostridioides difficile* Is Dependent on Two Peptidoglycan Deacetylases. *Journal of bacteriology* **202** (2020). <https://doi.org:10.1128/JB.00421-20>
- 8 Müh, U., Ellermeier, C. D. & Weiss, D. S. The WalRK Two-Component System Is Essential for Proper Cell Envelope Biogenesis in *Clostridioides difficile*. *Journal of bacteriology*, e0012122 (2022). <https://doi.org:10.1128/jb.00121-22>
- 9 Shepherd, T. R. *et al.* The Tiam1 PDZ domain couples to Syndecan1 and promotes cell-matrix adhesion. *Journal of molecular biology* **398**, 730-746 (2010). <https://doi.org:10.1016/j.jmb.2010.03.047>
- 10 Fagan, R. P. & Fairweather, N. F. *Clostridium difficile* has two parallel and essential Sec secretion systems. *The Journal of biological chemistry* **286**, 27483-27493 (2011). <https://doi.org:10.1074/jbc.M111.263889>
